# Supplementary material for: Transcriptomic analysis reveals key genes involved in oil accumulation and unsaturated fatty acids biosynthesis in Hibiseu manihot seeds
Source: Research Square preprint supplement (doi:10.21203/rs.3.rs-2664393/v1), 2023-03-21
Supplement: Supplementary file 1 [file 7e17c13247e9a30a80e9100d.docx]

Table S7. Primer list used by qRT-PCR analysis.

| Gene-id | Gene symbol | forword/reverse | Sequences (5'-3') |
| --- | --- | --- | --- |
| AeActin | AeActin | F | TCTTTCATCGGGATGGAAGC |
| R | ACTGAGCACAATGTTACCGTAGAG |
| c39533.graph_c0 | *SAD* | F | GTGCTACGACGAGTGGAGTT |
| R | TGCGTATCACTCTCACAGGC |
| c32662.graph_c0 | *GPAT1* | F | TCACCGGCTTGTTATCCACC |
| R | TCGGCCATCCACCACATAAG |
| c48530.graph_c0 | *ACCase-α* | F | ACAAAGCCCAAGGTAGACCA |
| R | ATCTGTGCTCTCAATCCCGC |
| c40823.graph_c0 | *FAD2* | F | GCCTCACTATGACTCGTCGG |
| R | TGCCTCCATTGCGTGGTAAT |
| c40931.graph_c0 | *FAD3* | F | ACCTCCTTTCCGTATTGCCG |
| R | AACATGGTTCCCTGAGCCAC |
| c49182.graph_c1 | *KASII* | F | TTGGTTCAGCAATGGGTGGT |
| R | CATTGCTAGCACAGCGGAAC |
| c50476.graph_c0 | *PDCT* | F | TGGCTCAGTGATTGCATCGT |
| R | CAACACCGACTGCCAAATCG |
| c44067.graph_c0 | *SAD* | F | GGAACGATCTGTGCATTGGC |
| R | CAATTCTTTGGGCGACAGCC |
